# Supplementary material for: Regime-based Aerosol-Cloud Interactions from CALIPSO-MODIS and the Energy Exascale Earth System Model version 2 (E3SMv2) over the Eastern North Atlantic
Source: Copernicus journal article supplement (doi:10.5194/egusphere-2025-3076), 2025-07-11
Supplement: Supplementary file 1 [file egusphere-2025-3076-supplement.pdf]

*Supplement of*

**Regime-based Assessments of Aerosol-Cloud Interactions from CALIPSO-MODIS  
Observations and E3SMv2 Simulations over Eastern North Atlantic**

Xiaojian Zheng et al.

**Table S1. Regime occurrences over ENA at 1 p.m. local time from ERA5 inputs**

| <b>Count<br/>(Fraction %)*</b> | <b>Regime 1<br/>Pre-Trough</b> | <b>Regime 2<br/>Post-Trough</b> | <b>Regime 3<br/>Ridge</b> | <b>Regime 4<br/>Trough</b> |
|--------------------------------|--------------------------------|---------------------------------|---------------------------|----------------------------|
| <b>Winter (DJF)</b>            | 269 (33.2%)                    | 166 (20.4%)                     | 313 (38.6%)               | 63 (7.8%)                  |
| <b>Spring (MAM)</b>            | 193 (23.3%)                    | 169 (20.4%)                     | 424 (51.2%)               | 42 (5.1%)                  |
| <b>Summer (JJA)</b>            | 26 (3.1%)                      | 22 (2.7%)                       | 780 (94.2%)               | 0 (0%)                     |
| <b>Fall (SON)</b>              | 111 (13.6%)                    | 122 (14.9%)                     | 581 (70.9%)               | 5 (0.6%)                   |
| <b>Total</b>                   | 599 (18.2%)                    | 479 (14.6%)                     | 2098 (63.8%)              | 110 (3.4%)                 |

\*Percentages in bracket denote the fractional occurrence of specific regime among total sample in each season category (and total sample).

**Table S2. Regime-based precipitation status from Satellite and E3SMv2**

| Mean $\pm$ Std                                              | Regime 1           | Regime 2           | Regime 3          | Regime 4            |
|-------------------------------------------------------------|--------------------|--------------------|-------------------|---------------------|
| <b>Satellite (CloudSat)</b>                                 |                    |                    |                   |                     |
| <b>Drizzle*</b><br><b>Fraction (%)</b>                      | 21.09 $\pm$ 22.89  | 21.79 $\pm$ 22.38  | 21.19 $\pm$ 23.35 | 18.73 $\pm$ 20.15   |
| <b>Light Rain**</b><br><b>Fraction (%)</b>                  | 13.50 $\pm$ 19.93  | 11.86 $\pm$ 16.55  | 10.77 $\pm$ 17.55 | 13.75 $\pm$ 18.52   |
| <b>Rain***</b><br><b>Fraction (%)</b>                       | 12.39 $\pm$ 22.96  | 11.85 $\pm$ 21.72  | 7.80 $\pm$ 18.54  | 14.34 $\pm$ 23.71   |
| <b>(Drizzle + Light Rain + Rain)</b><br><b>Fraction (%)</b> | 46.98 $\pm$ 36.11  | 45.49 $\pm$ 35.01  | 39.76 $\pm$ 36.37 | 46.81 $\pm$ 36.02   |
| <b>E3SMv2</b>                                               |                    |                    |                   |                     |
| <b>In-cloud Rain†</b><br><b>Fraction (%)</b>                | 50.25 $\pm$ 29.86  | 42.63 $\pm$ 29.37  | 34.27 $\pm$ 32.58 | 43.81 $\pm$ 26.52   |
| <b>In-cloud Rain LWP (g m2)</b>                             | 84.46 $\pm$ 205.62 | 43.23 $\pm$ 121.03 | 17.99 $\pm$ 95.99 | 118.84 $\pm$ 215.23 |

\*CloudSat drizzle fraction as the number of points with  $-15 \leq \text{maximum dBZ} \leq -7$  and CTH  $< 3$  km divided by total number of CTH  $< 3$  km, within each ~25km domain.

\*\*CloudSat light rain fraction as the number of points with  $-7 \leq \text{maximum dBZ} \leq 0$  and CTH  $< 3$  km divided by total number of CTH  $< 3$  km, within each ~25km domain.

\*\*\*CloudSat rain fraction as the number of points maximum dBZ  $> 0$  and CTH  $< 3$  km divided by total number of CTH  $< 3$  km, within each ~25km domain.

†E3SM fractional rain area within each grid (~110 km).

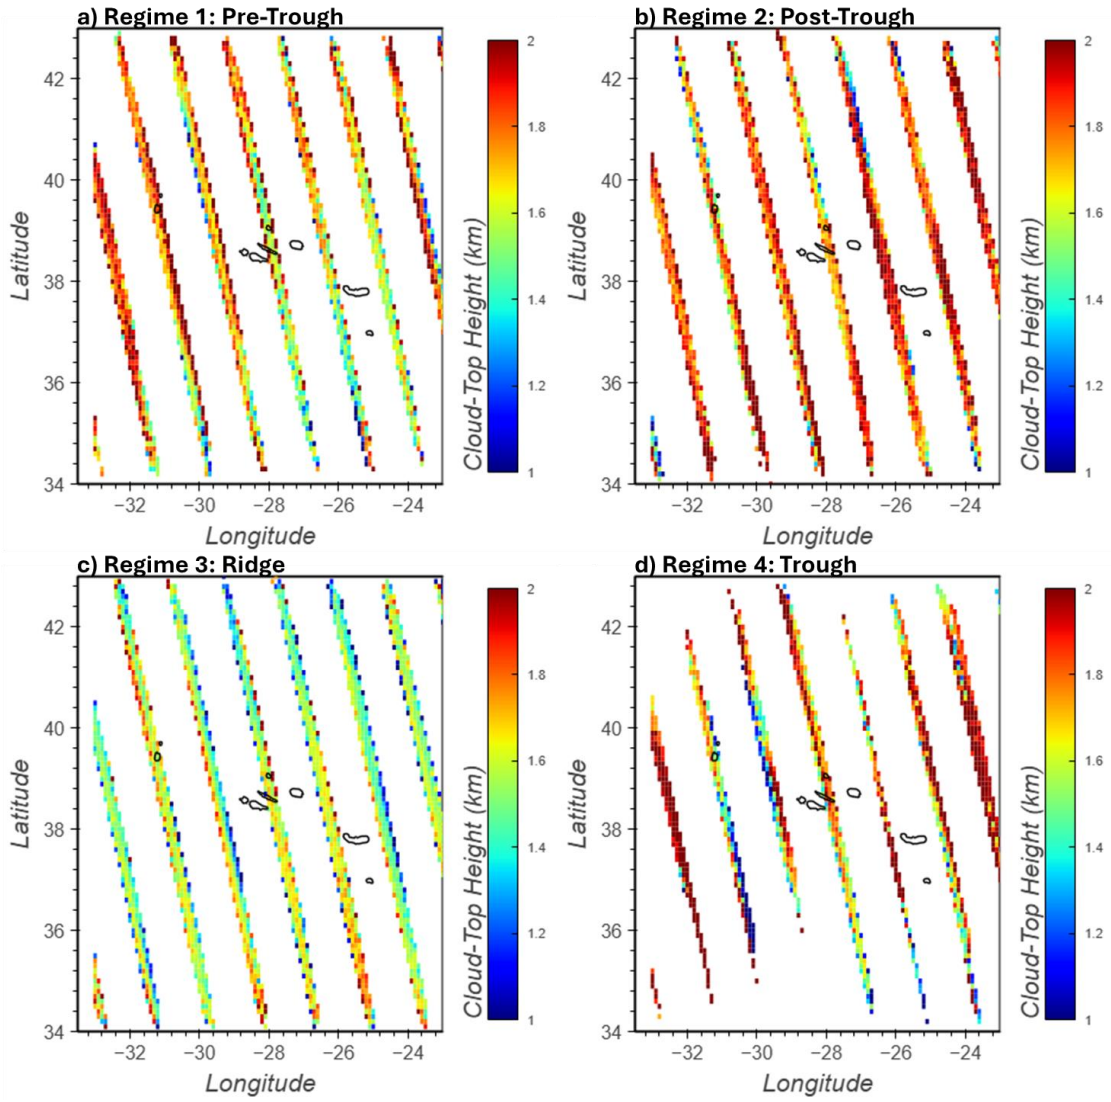

**Figure S1.** Regime-based composite map of cloud-top height derived from satellite (MODIS) for a) Regime 1, b) Regime 2, c) Regime 3 and d) Regime 4. The raw 25km grids along the granule are further aggregated into 100km grid-cells in producing this plot to ensure the composite sample sizes and a better visualization.

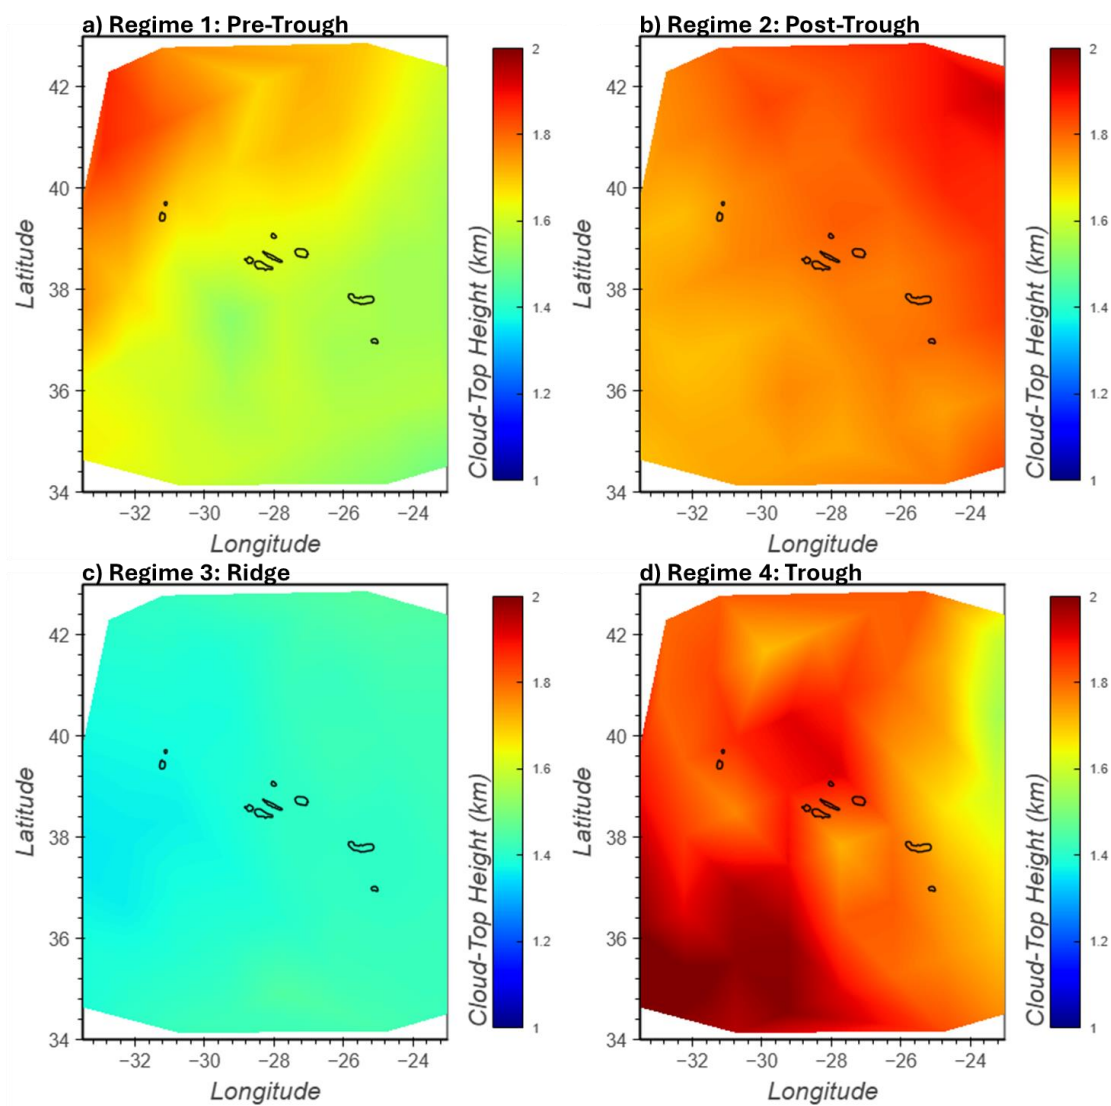

**Figure S2.** Regime-based composite map of cloud-top height derived from E3SMv2 for a) Regime 1, b) Regime 2, c) Regime 3 and d) Regime 4. The raw irregular model grid cell data is triangularly-smoothed and rasterized for better visualization.
